# Supplementary material for: scInTime: A Computational Method Leveraging Single-Cell Trajectory and Gene Regulatory Networks to Identify Master Regulators of Cellular Differentiation
Source: MDPI journal article supplement (doi:10.3390/genes13020371), 2022-02-18
Supplement: s1 [file s1]

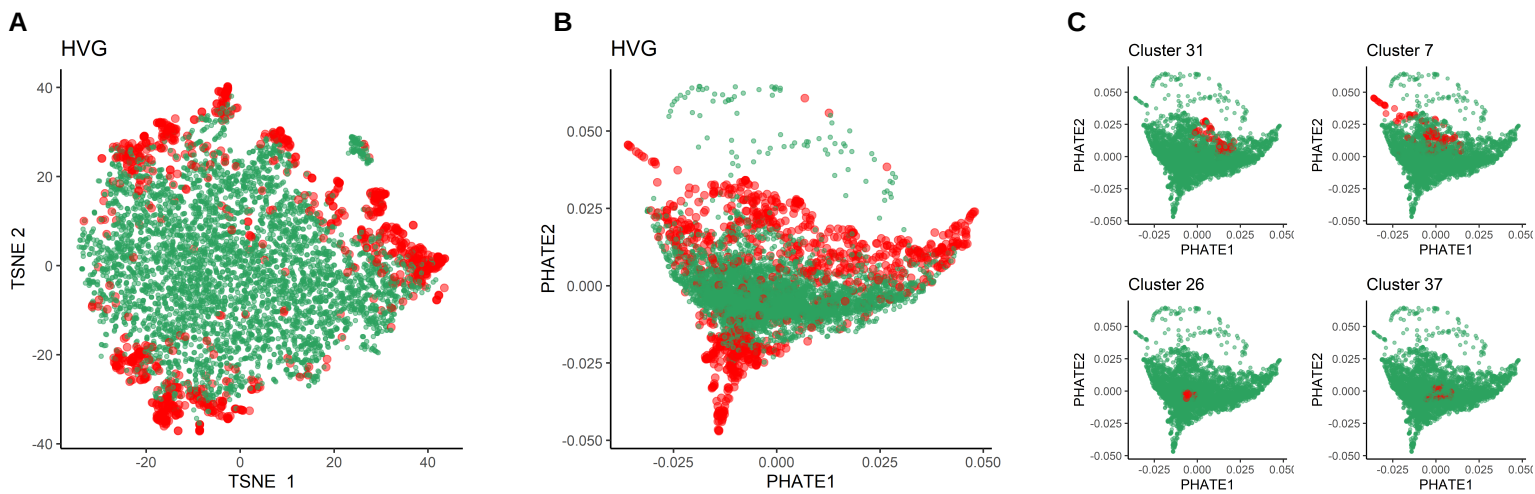

**Figure S1.** Visualization of the regression coefficient matrix on tSNE and PHATE embedding. **(A)** tSNE embedding of the regression coefficient matrix (2000 HVGs are highlighted in red). **(B)** PHATE embedding of the regression coefficient matrix (the 2000 HVGs are highlighted in red). **(C)** Visualization of four selected clusters on the PHATE embedding. Genes of each cluster are highlighted in red.
